# Supplementary material for: Controlling the magnetic anisotropy of RumIrn (m + n = 3) clusters using the MgO(001) substrate
Source: Royal Society of Chemistry journal article supplement (doi:10.1039/d2cp03760b), 2022-12-01
Supplement: d2cp03760b1.pdf [file d2cp03760b1.pdf]

Supporting Information for

**Controlling the magnetic anisotropy of  $\text{Ru}_m\text{Ir}_n$  ( $m+n=3$ )  
clusters using MgO(001) substrate**

Qing Diao<sup>a</sup>, Chengwei Yang<sup>a</sup>, Honglei Liu<sup>a</sup>, Hongxia Yan<sup>a</sup>,

Guixian Ge<sup>a\*</sup>, Xiaodong Yang<sup>a\*</sup>, Jueming Yang<sup>a\*</sup>

<sup>a</sup> Key Laboratory of Ecophysics and Department of Physics, College of Science, Shihezi University, Shihezi, 832003, PR China. \*Corresponding authors.

**Table S1.** The calculated MAE (in meV) of some systems versus  $U_{eff}$  value (in eV).

| $U_{EFF}$<br>(RU) | $U_{EFF}$<br>(IR) | Ru <sub>2</sub> Ir | Ir <sub>3</sub> | Ru <sub>3</sub> @MgO | Ru <sub>2</sub> Ir@MgO | RuIr <sub>2</sub> @MgO | Ir <sub>3</sub> @MgO |
|-------------------|-------------------|--------------------|-----------------|----------------------|------------------------|------------------------|----------------------|
| <b>1.42</b>       | 1.34              | 7.97               | -12.77          | -1.77                | -4.64                  | -24.07                 | 20.23                |
| <b>1.92</b>       | 1.84              | 4.70               | -10.36          | -2.30                | 4.32                   | 0.17                   | 21.09                |
| <b>2.42</b>       | 2.34              | 4.07               | -8.18           | -2.86                | 3.93                   | 4.18                   | 20.56                |
| <b>2.92</b>       | 2.84              | 2.73               | -3.77           | -2.57                | -1.55                  | 15.50                  | 21.79                |
| <b>3.42</b>       | 3.34              | 0.92               | 3.23            | -2.22                | -4.29                  | 12.91                  | 22.26                |

**Table S2.** The calculated  $M_S$  (in  $\mu_B$ ) of some systems versus  $U_{eff}$  value (in eV).

| $U_{EFF}$<br>(RU) | $U_{EFF}$<br>(IR) | Ru <sub>2</sub> Ir | Ir <sub>3</sub> | Ru <sub>3</sub> @MgO | Ru <sub>2</sub> Ir@MgO | RuIr <sub>2</sub> @MgO | Ir <sub>3</sub> @MgO |
|-------------------|-------------------|--------------------|-----------------|----------------------|------------------------|------------------------|----------------------|
| <b>1.42</b>       | 1.34              | 5.000              | 1.000           | 8.000                | 5.000                  | 6.000                  | 3.000                |
| <b>1.92</b>       | 1.84              | 5.000              | 1.000           | 8.000                | 7.000                  | 6.000                  | 3.000                |
| <b>2.42</b>       | 2.34              | 5.000              | 1.000           | 8.000                | 7.000                  | 6.000                  | 3.000                |
| <b>2.92</b>       | 2.84              | 5.000              | 1.002           | 8.000                | 7.000                  | 6.000                  | 3.000                |
| <b>3.42</b>       | 3.34              | 5.000              | 1.000           | 8.000                | 5.000                  | 4.000                  | 3.000                |

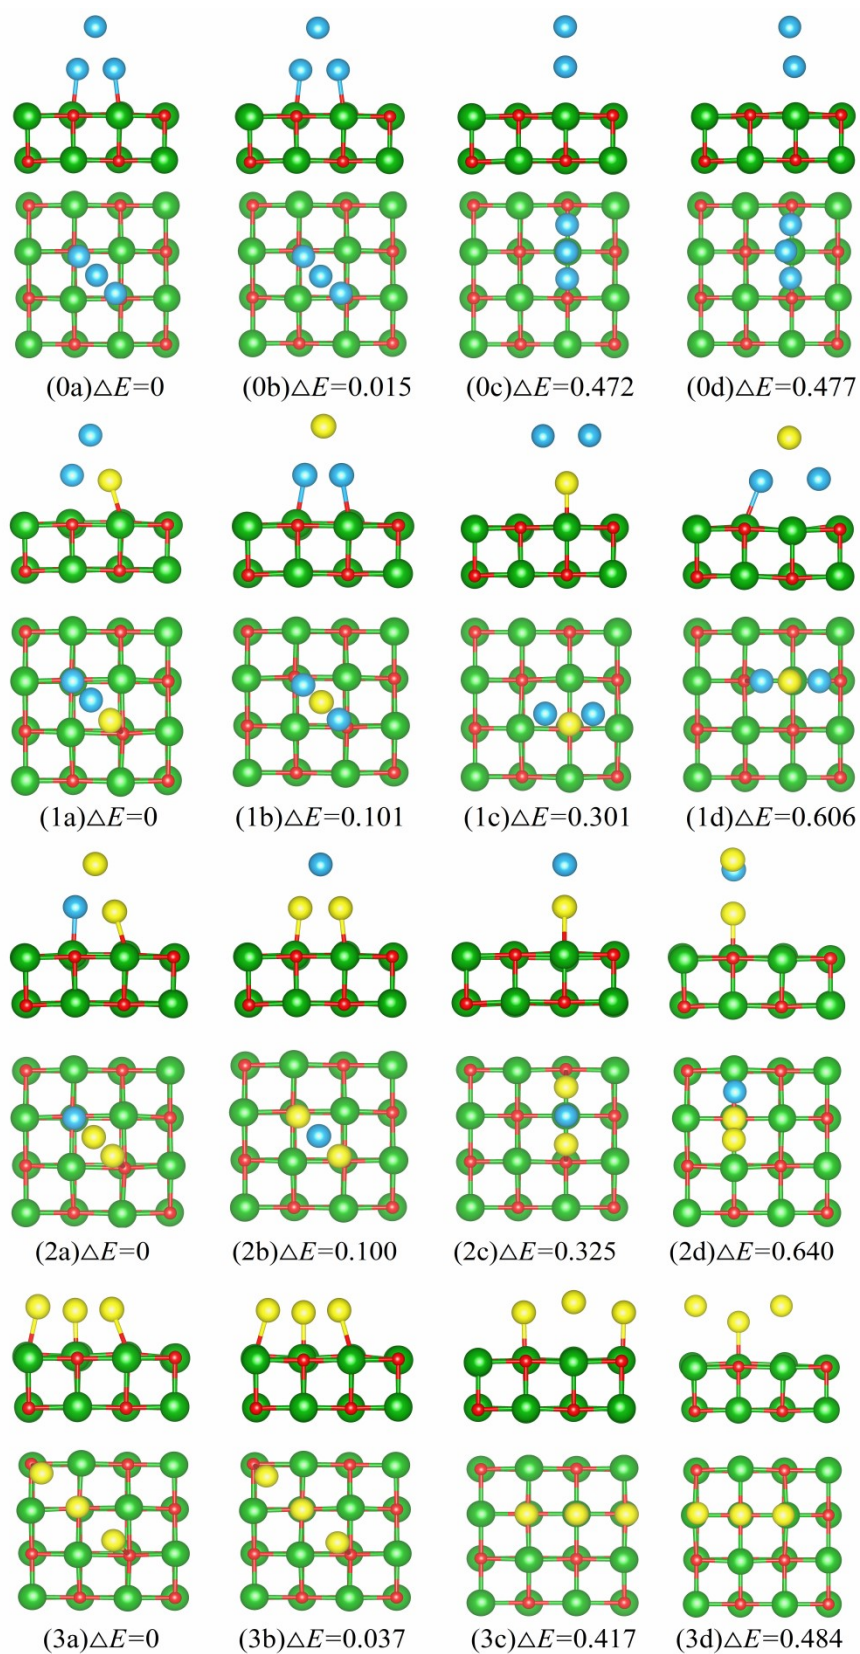

**Figure S1.** The energy differences between the sub-stable structure and the lowest energy structure of  $\text{Ru}_m\text{Ir}_n@\text{MgO}$ . The numbers in brackets represent the number of Ir. Red, green yellow and blue balls represent Mg, O, Ir and Ru atoms, respectively.

**Table S3.** Coordinates of Ru<sub>m</sub>Ir<sub>n</sub> clusters and Ru<sub>m</sub>Ir<sub>n</sub>@MgO (m+n=3) systems. All the lattice parameters of all periodic models are 8.4918 Å, 8.4918 Å and 22.1230 Å, respectively. The angles of  $\alpha$ ,  $\beta$  and  $\gamma$  is all 90°.

| STRUCTURE               | COORDINATES            |                                                                |                                                                |                                                                |
|-------------------------|------------------------|----------------------------------------------------------------|----------------------------------------------------------------|----------------------------------------------------------------|
| <b>RU<sub>3</sub></b>   | Ru<br>3<br>Direct      | 0.1312046918880815<br>0.0328565744070551<br>0.2356687437048638 | 0.6129406256853983<br>0.7158917093293583<br>0.5128976929852423 | 0.3707849939842554<br>0.2858775583386560<br>0.2863674206770830 |
| <b>RU<sub>2</sub>IR</b> | Ir Ru<br>1 2<br>Direct | 0.4491740835586133<br>0.3491290684426694<br>0.2505268349987149 | 0.3049993311660446<br>0.4063521225895270<br>0.5033685052444281 | 0.2778575809786321<br>0.3711671152126086<br>0.2882453178087585 |
| <b>RUIR<sub>2</sub></b> | Ir Ru<br>2 1<br>Direct | 0.4602058951413085<br>0.3659360534831258<br>0.2678680743755694 | 0.3138028744265862<br>0.4074868254772957<br>0.5057903010961137 | 0.2738622049359847<br>0.3708148570094618<br>0.2809729380545503 |

|                       |                    |                    |                    |
|-----------------------|--------------------|--------------------|--------------------|
| <b>IR<sub>3</sub></b> | Ir                 |                    |                    |
|                       | 3                  |                    |                    |
|                       | Direct             |                    |                    |
|                       | 0.4298753876607057 | 0.6817849697463595 | 0.2915016517828106 |
|                       | 0.2482474474894239 | 0.5002665515639750 | 0.2920268973155439 |
|                       | 0.0662571608498697 | 0.3191284706896841 | 0.2916714599016138 |

| STRUCTURE                      | COORDINATES        |                    |                    |
|--------------------------------|--------------------|--------------------|--------------------|
| <b>RU<sub>3</sub>@MG<br/>O</b> | O                  | Mg                 | Ru                 |
|                                | 16                 | 16                 | 3                  |
|                                | Direct             |                    |                    |
|                                | 0.0114966265655723 | 0.9883022642683736 | 0.0865538215648239 |
|                                | 0.0125128848762091 | 0.4909985153269198 | 0.0889357530675204 |
|                                | 0.2657534413221414 | 0.4849742310115945 | 0.1871295294881677 |
|                                | 0.2619763118209845 | 0.9909339930374964 | 0.1841177994585077 |
|                                | 0.2603819580000740 | 0.2407832531002037 | 0.0865925455649485 |
|                                | 0.2594008721968509 | 0.7379333564321220 | 0.0889155164757287 |
|                                | 0.5096070099865876 | 0.4900096888353394 | 0.0865750505384405 |
|                                | 0.5103916436978145 | 0.9888458445775500 | 0.0852389472336582 |
|                                | 0.5121079926939346 | 0.2384320955365311 | 0.1836680743698655 |
|                                | 0.5123871508828435 | 0.7402995550711507 | 0.1841267336501753 |
|                                | 0.7598784192798068 | 0.9905900054040043 | 0.1836393668092514 |
|                                | 0.7616452903954581 | 0.2400917684702121 | 0.0852661520667926 |
|                                | 0.7620837154524090 | 0.7388923067001034 | 0.0865867134946293 |
|                                | 0.7595411146307635 | 0.4885304715950148 | 0.1841142009511783 |
|                                | 0.0061473162173969 | 0.7443900415989518 | 0.1868108745582341 |
|                                | 0.0102512275777265 | 0.2380223642523679 | 0.1841145326068835 |
|                                | 0.0113442612779567 | 0.2398017034860452 | 0.0890417699131417 |
|                                | 0.0111512295750015 | 0.7392805359585716 | 0.0896035311662178 |
|                                | 0.2606483210531525 | 0.9891820798709416 | 0.0890608922249124 |
|                                | 0.2688290909107531 | 0.7473963881207843 | 0.1858277762424736 |
|                                | 0.2628370416514892 | 0.2336035548181321 | 0.1833490113215752 |
|                                | 0.2607214960819932 | 0.4897771499597373 | 0.0896444663382342 |
|                                | 0.5107037192614156 | 0.2397520646539955 | 0.0882962451912425 |
|                                | 0.5106362379825571 | 0.7391187967293287 | 0.0890554573088218 |
|                                | 0.5127255590650700 | 0.9912123255701586 | 0.1820579693198359 |
|                                | 0.5168731490967391 | 0.4876795199857571 | 0.1833384619821517 |
|                                | 0.7612313254793300 | 0.9892331297370189 | 0.0882871458257890 |
|                                | 0.7592756077984615 | 0.2377643491227761 | 0.1820627306504032 |
|                                | 0.7549395831717027 | 0.7413210923085584 | 0.1833169985922803 |
|                                | 0.7612358704096437 | 0.4898263744775243 | 0.0890606407439506 |
| 0.0029504400716175             | 0.4814795001563570 | 0.1857758211968630 |                    |
| 0.0091795980621652             | 0.9955015527943635 | 0.1832857885516624 |                    |
| 0.1312300653382007             | 0.6125905316563757 | 0.3748420306747226 |                    |
| 0.0335565407522398             | 0.7149677894616092 | 0.2839306874676196 |                    |
| 0.2349376553639130             | 0.5141716529140681 | 0.2842570293893051 |                    |

|  |  |
|--|--|
|  |  |
|--|--|

| STRUCTURE                   | COORDINATES        |                    |                    |    |
|-----------------------------|--------------------|--------------------|--------------------|----|
|                             | O                  | Mg                 | Ir                 | Ru |
|                             | 16                 | 16                 | 1                  | 2  |
|                             | Direct             |                    |                    |    |
| <b>RU<sub>2</sub>IR@MGO</b> | 0.0027094774297463 | 0.0022752453528023 | 0.0843477856046685 |    |
|                             | 0.0028503007201175 | 0.5007796201560819 | 0.0855875911991093 |    |
|                             | 0.2433303650993853 | 0.5103633209931697 | 0.1864203035833934 |    |
|                             | 0.2502728140538789 | 0.9994663047844746 | 0.1833255787264499 |    |
|                             | 0.2543549279705148 | 0.2533845883253368 | 0.0898396157792847 |    |
|                             | 0.2527813455352028 | 0.7506398952186086 | 0.0856125058614550 |    |
|                             | 0.5002801293267135 | 0.4992268674943892 | 0.0899784554551857 |    |
|                             | 0.5016517616439273 | 0.0028948225902090 | 0.0861072712503504 |    |
|                             | 0.5159752011804795 | 0.2377459049841921 | 0.1884064785297328 |    |
|                             | 0.5036793271403526 | 0.7543093638965397 | 0.1835492699019477 |    |
|                             | 0.7544349622112738 | 0.9991990542172128 | 0.1833526296550118 |    |
|                             | 0.7504883286886310 | 0.2518656415180032 | 0.0861230029686269 |    |
|                             | 0.7512171046882536 | 0.7508489114928996 | 0.0843178847157796 |    |
|                             | 0.7542797205531185 | 0.5034705122812478 | 0.1833778364223236 |    |
|                             | 0.0007801810147100 | 0.7528447268483743 | 0.1832402540043054 |    |
|                             | 0.9993795440075796 | 0.2500556106851283 | 0.1834785955574164 |    |
|                             | 0.0027359171523434 | 0.2519547956509354 | 0.0884541796353863 |    |
|                             | 0.0025366615213159 | 0.7510784527353549 | 0.0871593117726159 |    |
|                             | 0.2525542832501343 | 0.0027161655152649 | 0.0887534157045465 |    |
|                             | 0.2501716644094524 | 0.7578554579393640 | 0.1819977573298379 |    |
|                             | 0.2400584282255711 | 0.2444391742451486 | 0.1876305064915062 |    |
|                             | 0.2523997478893651 | 0.5012534323584181 | 0.0901652717319829 |    |
|                             | 0.5017720647981734 | 0.2518489013572414 | 0.0900251010105569 |    |
|                             | 0.5016885498319514 | 0.7508540992561138 | 0.0884840194614444 |    |
|                             | 0.5036713128195905 | 0.9940007163218376 | 0.1823511061224307 |    |
|                             | 0.5093988414487840 | 0.5137604547993284 | 0.1876343482252444 |    |
|                             | 0.7517796066970223 | 0.0017982289623689 | 0.0876886679675040 |    |
|                             | 0.7596764191769330 | 0.2501041745393446 | 0.1823546098870540 |    |
|                             | 0.7545703898443902 | 0.7534014224626669 | 0.1811531960058843 |    |
|                             | 0.7508905743990719 | 0.5010915000536738 | 0.0887928386790343 |    |
|                             | 0.9959018763273786 | 0.5035786739831198 | 0.1819737077254858 |    |
|                             | 0.0003281702566140 | 0.9991879602587314 | 0.1811035915830465 |    |
|                             | 0.4504433747864768 | 0.3037474586946658 | 0.2767625034915626 |    |
| 0.3480853861230638          | 0.4072964958232057 | 0.3725881021462467 |                    |    |
| 0.2503010057784595          | 0.5036718672045910 | 0.2879227418136192 |                    |    |

| STRUCTURE                   | Coordinates        |                    |                    |         |
|-----------------------------|--------------------|--------------------|--------------------|---------|
| <b>RUIR<sub>2</sub>@MGO</b> | O<br>16            | Mg<br>16           | Ir<br>2            | Ru<br>1 |
|                             | Direct             |                    |                    |         |
|                             | 0.0158586736503637 | 0.0088257569921583 | 0.0820242679877333 |         |
|                             | 0.0161534720960036 | 0.5074584747419532 | 0.0837712598946783 |         |
|                             | 0.2549608380180116 | 0.5184435422870943 | 0.1851447027656566 |         |
|                             | 0.2629604133395012 | 0.0062145713581527 | 0.1812505048613896 |         |
|                             | 0.2671729004269160 | 0.2606621849256691 | 0.0883509576352229 |         |
|                             | 0.2658925179135698 | 0.7571805181035566 | 0.0837977825240569 |         |
|                             | 0.5128540474433781 | 0.5060719248635945 | 0.0883261757371461 |         |
|                             | 0.5144405454847191 | 0.0102203911500423 | 0.0840513116373555 |         |
|                             | 0.5299170207678686 | 0.2434688466892357 | 0.1864824532597673 |         |
|                             | 0.5171583488039181 | 0.7618811943599920 | 0.1810705471223261 |         |
|                             | 0.7675124298650120 | 0.0057312083195060 | 0.1809950170310992 |         |
|                             | 0.7632072515425593 | 0.2589463016074530 | 0.0840120250333465 |         |
|                             | 0.7644719352315467 | 0.7576042982266581 | 0.0820238152398957 |         |
|                             | 0.7671866429330938 | 0.5105643075991176 | 0.1811774530393808 |         |
|                             | 0.0138837554719871 | 0.7596083784377420 | 0.1812111394061937 |         |
|                             | 0.0114966462002040 | 0.2560881288450028 | 0.1810705054106869 |         |
|                             | 0.0155535832421912 | 0.2585697288132179 | 0.0863231295486827 |         |
|                             | 0.0157042484451628 | 0.7576834792517930 | 0.0850388570384544 |         |
|                             | 0.2654903416756875 | 0.0095411665685850 | 0.0867205098704902 |         |
|                             | 0.2635521377163046 | 0.7659006075056970 | 0.1801486783642180 |         |
|                             | 0.2508186598042433 | 0.2494637067260487 | 0.1860827048342693 |         |
|                             | 0.2653181017616603 | 0.5080339778932906 | 0.0883053360803784 |         |
|                             | 0.5144564220652698 | 0.2588503343001399 | 0.0881654073278240 |         |
|                             | 0.5147197506450083 | 0.7578312951233924 | 0.0863418259206459 |         |
|                             | 0.5169733388881607 | 0.0004019317171211 | 0.1803320178941769 |         |
|                             | 0.5238862865414017 | 0.5226430886512075 | 0.1860572899552515 |         |
|                             | 0.7646828589419293 | 0.0086098874123404 | 0.0853670804634392 |         |
|                             | 0.7729382586394076 | 0.2564733044539081 | 0.1802643459681168 |         |
|                             | 0.7679056357557176 | 0.7605952044320494 | 0.1789405577079497 |         |
|                             | 0.7637909085323923 | 0.5078792074689866 | 0.0866584599606705 |         |
|                             | 0.0075341803361485 | 0.5098061234460806 | 0.1801194381975517 |         |
| 0.0127281391463032          | 0.0054914519685411 | 0.1789578931144516 |                    |         |
| 0.4648137930616284          | 0.3086344611243099 | 0.2733468819234455 |                    |         |
| 0.3649867072550926          | 0.4087892846776437 | 0.3699260200156108 |                    |         |
| 0.2642089523576144          | 0.5096615729587261 | 0.2823736622284561 |                    |         |

| STRUCTURE                      | Coordinates        |                     |                    |
|--------------------------------|--------------------|---------------------|--------------------|
| <b>IR<sub>3</sub>@MG<br/>O</b> | O<br>16            | Mg<br>16            | Ir<br>3            |
|                                | Direct             |                     |                    |
|                                | 0.9871494556190707 | 0.4932823379247377  | 0.0892182634940755 |
|                                | 0.2391637202986816 | 0.2417403104330101  | 0.0888759995576665 |
|                                | 0.9912649352412168 | 0.2415488049881246  | 0.1867923812144330 |
|                                | 0.7395927035004254 | 0.2456420738016265  | 0.0891681774473073 |
|                                | 0.4888831623092295 | 0.2434739453291432  | 0.1853054034101961 |
|                                | 0.2387454756048875 | 0.7448712120170826  | 0.0893218814491892 |
|                                | 0.2355313407283991 | 0.4906863986102779  | 0.1858905842434703 |
|                                | 0.9894327680809775 | 0.7441870156317195  | 0.1853062335598627 |
|                                | 0.7380770933491191 | 0.7420569854619394  | 0.0907970921019295 |
|                                | 0.7514112539765700 | 0.4815421150325097  | 0.1944358218166206 |
|                                | 0.4838282565920673 | 0.7490816152488380  | 0.1826777834784047 |
|                                | 0.4906357604911054 | 0.4945954551638925  | 0.0908924292837255 |
|                                | 0.2330173418580880 | -0.0001284120794379 | 0.1932136125151134 |
|                                | 0.9911829344094449 | 0.9935049872852619  | 0.0887140279497966 |
|                                | 0.7421510452445904 | 0.9972883376226088  | 0.1857205701470501 |
|                                | 0.4876942814213520 | 0.9940613449060351  | 0.0893051053450008 |
|                                | 0.9854976172740334 | 0.9946449960697613  | 0.1853327766035867 |
|                                | 0.9893197206829404 | 0.2434911933983726  | 0.0914752107460365 |
|                                | 0.2381876339591271 | 0.2473237528891399  | 0.1853758097945359 |
|                                | 0.4894754357855285 | 0.2440027141204491  | 0.0916915858600599 |
|                                | 0.7414469727227172 | 0.2392688936880391  | 0.1857442346460726 |
|                                | 0.9935292708127152 | 0.4914401569619127  | 0.1857951634874981 |
|                                | 0.9888285375655667 | 0.7432563019395680  | 0.0916626932279248 |
|                                | 0.2391210487843581 | 0.4942495985352485  | 0.0914598216924783 |
|                                | 0.2297410955403052 | 0.7359085294219317  | 0.1889164497338794 |
|                                | 0.4790185113860576 | 0.4855230310494996  | 0.1893424175474881 |
|                                | 0.4884743798648605 | 0.7442680478641678  | 0.0906582276658892 |
|                                | 0.7384678365130979 | 0.4943001519609807  | 0.0915690783438981 |
| 0.7472968134832969             | 0.7537747316494448 | 0.1893079305066322  |                    |
| 0.2402122817139944             | 0.9925116950369217 | 0.0894632431975282  |                    |
| 0.4970131935235721             | 0.0031422121559340 | 0.1888453934047913  |                    |
| 0.7385447113067766             | 0.9936260651563233 | 0.0913591276190557  |                    |
| 0.2860308151445360             | 0.9474021950529190 | 0.2855618026512720  |                    |
| 0.4772495116778784             | 0.7558553786804757 | 0.2783042238798499  |                    |
| 0.6657331925334123             | 0.5670357579915444 | 0.2804795603776895  |                    |



|  |  |
|--|--|
|  |  |
|--|--|

**Text S1.** Computation details for computing SOC, MAE, magnetic moment etc.

We choose the direction perpendicular to the MgO substrate as the z-axis direction and the direction parallel to the substrate as the x-axis direction to create a three-dimensional orthogonal coordinate system. To consider the Coulomb interaction, we use a method of  $GGA+U$  with  $U$ - $J$  values for 4d and 5d states (2.42 eV for Ir and 2.34 eV for Ru ) to describe the d electrons<sup>1-3</sup>. We compute SOC in a self-consistent method using the VASP's noncollinear mode. Self-consistent computations with SOC in three directions (x, y and z) were performed in order to achieve MAE. The MAE is defined as the difference between total energy in the perpendicular (z) and in-plane (x) directions considering the SOC. Static calculation to obtain the total spin magnetic moment.

[1] V. I. Anisimov, J. Zaanen and O. K. Andersen, *Phys. Rev. B*, 1991, 44, 943–954.

[2] P. Błoński, J. Hafner, *Phys. Rev. B*, 2009, 79(22): 224418.

[3] J. Hu and R. Wu, *Nano Lett.*, 2014, 14, 1853–1858.
